# Supplementary material
Source: Elsevier journal article supplement (https://www.sciencedirect.com/science/article/pii/S0211139X22000415)
Supplement: mmc1 [file S0211139X22000415:mmc1.doc]

**Puntos clave:**

- - La investigación presentada es pionera ya que analiza las diferencias en la aplicación de un programa de formación de cuidadores en función del tipo de cuidador, aspecto que hasta la fecha no se había analizado en la literatura científica.
  - El presente estudio demuestra que existen diferencias socio-demográficas entre cuidadores profesionales y cuidadores familiares. Esto es importante a la hora de diseñar programas de formación de cuidadores para que implemente programas de estimulación cognitiva en personas mayores porque las necesidades y características de los dos grupos de cuidadores son distintas.
  - El presente estudio demuestra que el programa de formación de cuidadores produce beneficios en los cuidadores profesionales y familiares al proporcionarles herramientas que les hacen sentir más competente y seguros en su labor de cuidado diaria.
  - El presente estudio demuestra que un programa de formación de cuidadores incrementa el grado de implicación y la satisfacción en el proceso de cuidado de la persona mayor.
